# Supplementary material for: Enhancing Quality of Life in Pediatric Palliative Care: Insights, Challenges, and Future Directions—A Systematic Review
Source: Hindawi journal article supplement (doi:10.1155/2024/6532492), 2024-01-01
Supplement: f1 [file 6532492.f1.docx]

Supplementary file 1. Characteristics of the included studies (n=30)

| **Category** | **Author** | **Year** | **Title** | **Journal** | **Relevant aspects of the research** |
| --- | --- | --- | --- | --- | --- |
| C4 | Adistie, F., Lumbantobing, V. B., & Maryam, N. N. A. | 2020 | The needs of children with terminal illness: a qualitative study. | *Child Care in Practice* | The insight of the needs of children with terminal illness is studied through interviews and focus groups to the nurses and parents of children with terminal illness in a qualitative intergroup study. |
| C4 | Alonso, L., García, D., & Romero, K. | 2006 | Una experiencia de pedagogía hospitalaria con niños en edad preescolar.  *An experience of hospital pedagogy with pre-school children.* | *Educere* | An insight of the needs of hospitalized preschool children is given through a mixed method research (focus group and intervention) with an intergroup study design considering the preschool children admitted to hospital and their families. |
| C2 | Aruda, M. M., Kelly, M., & Newinsky, K. | 2011 | Unmet needs of children with special health care needs in a specialized day school setting. | *The Journal of School Nursing* | Insight at the needs of families with a child with special health care needs through the experience of parents of children with special health care needs gathered from an intra-group survey design. |
| C3 | Beccaro, M., Gollo, G., Ceccon, S., Giordano, M., Salvini, E., Vignali, S., ... & Di Leo, S | 2015 | Students, severe illness, and palliative care: results from a pilot study on a school-based intervention. | *American Journal of Hospice and Palliative Medicine* | A quantitative design is used to determine the usefulness of school-based interventions for secondary school students with severe illnesses. |
| C2 | Boo, Y. T., Rodríguez, J. R., & Torres, A. C. | 2021 | Los materiales didácticos en las escuelas de hospital: un proyecto de aprendizaje-servicio para atender a la diversidad del alumnado hospitalizado.  *Teaching materials in hospital schools: a service-learning project to cater for the diversity of hospitalised students.* | *Revista Brasileira de Educação Especial* | Teaching materials are designed for the students in the hospital classroom and the teaching staff, and a process of validation and adaptation of these teaching materials is designed using a qualitative method. |
| C2 | Davis, K. G. | 2016 | Integrating pediatric palliative care into the school and community. | *Pediatric Clinics* | The authors provide an insight into the current state of paediatric palliative care in relation to the school and the community with paediatric palliative care users as participants. |
| C1 | Dogan, M., Hirschfeld, G., Blankenburg, M., Frühwald, M., Ahnert, R., Braun, S., ... & Wager, J. | 2021 | Effectiveness of a psychosocial aftercare program for youth aged 8 to 17 years with severe chronic pain: A randomized clinical trial. | *JAMA network open* | The effectiveness of a psychosocial aftercare program is analysed using a quantitative design. An intervention is carried out using a psychosocial aftercare program and a questionnaire for paediatric patients with severe chronic pain and their families. |
| C2 | Emerson, N. D., Distelberg, B., Morrell, H. E., Williams-Reade, J., Tapanes, D., & Montgomery, S. | 2016 | Quality of life and school absenteeism in children with chronic illness. | *The Journal of School Nursing* | This research analyses the relationship between perceived quality of life and school absenteeism in children and adolescents with a chronic illness and their parents by means of a quantitative methodology using a questionnaire. |
| C2 | Engelke, M. K., Guttu, M., Warren, M. B., & Swanson, M. | 2008 | School nurse case management for children with chronic illness: Health, academic, and quality of life outcomes. | *The Journal of School Nursing* | The impact of school nurses on chronically ill children is analysed through the implementation of a school nurse programme. |
| C4 | Finning, K., Neochoriti Varvarrigou, I., Ford, T., Panagi, L., & Ukoumunne, O. C. | 2022 | Mental health and school absenteeism in children with long‐term physical conditions: A secondary analysis of the British Child and Adolescent Mental Health Surveys 2004 and 2007 | *Child: Care, Health and Development* | The relationship between mental health, school absenteeism and long-term physical condition is measured by means of an intra-group questionnaire to Children and young people with long-term physical condition. The methodology used is quantitative. |
| C2 | Gaintza, Z., Ozerinjauregi, N., & Aróstegui, I. | 2018 | Educational inclusion of students with rare diseases: Schooling students with spina bífida. | *British Journal of Learning Disabilities* | School children with spina bifida and their families express their experiences in focus groups regarding their needs in an inclusive school context. |
| C2 | Greenley, R. N., Gumidyala, A. P., Nguyen, E., Plevinsky, J. M., Poulopoulos, N., Thomason, M. M., ... & Kahn, S. A. | 2015 | Can you teach a teen new tricks? Problem solving skills training improves oral medication adherence in pediatric patients with inflammatory bowel disease participating in a randomized trial. | *Inflammatory bowel diseases* | A randomised questionnaire and intervention trial tests whether Problem Solving Skills Training Improves Oral Medication Adherence in Pediatric patients with inflammatory bowel disease. |
| C4 | Hossny, E. M., El-Hattab, A. F., Raouf, B. M. A., & Hassan, M. R. | 2020 | Health-related quality of life assessment in a group of children with juvenile idiopathic arthritis. | *Egyptian Journal of Pediatric Allergy and Immunology* | A questionnaire is administered to children with juvenile idiopathic arthritis to understand the impact of health-related quality of life in this chronic disease. |
| C4 | Ilowite, M. F., Al‐Sayegh, H., Ma, C., Dussel, V., Rosenberg, A. R., Feudtner, C., ... & Bona, K. | 2018 | The relationship between household income and patient‐reported symptom distress and quality of life in children with advanced cancer: A report from the PediQUEST study | *Cancer* | The relationship between family income and patient-reported symptoms of distress and quality of life in children with advanced cancer is analysed using an intergroup questionnaire. |
| C1 | Lyon, M. E., Jacobs, S., Briggs, L., Cheng, Y. I., & Wang, J. | 2014 | A longitudinal, randomized, controlled trial of advance care planning for teens with cancer: anxiety, depression, quality of life, advance directives, spirituality. | *Journal of Adolescent Health* | The acceptability of Family-Centered Advance Care Planning for Teens with a Cancer diagnosis. Data collection is by questionnaire from a longitudinal, randomized, controlled trial. |
| C1 | O'Quinn, L. P., & Giambra, B. K. | 2014 | Evidence of improved quality of life with pediatric palliative care. | *Pediatric nursing* | Intervention through a paediatric palliative care plan for paediatric palliative patients and their families to improve quality of life or health-related quality of life. |
| C4 | Pais, S. C., & Menezes, I. | 2019 | How do we live with chronic disease? A rights-based approach promoting the wellbeing of children with chronic disease. | *Ciência & Saúde Coletiva* | Children with a chronic disease and their families expose the central role that inclusive contexts have on children’s wellbeing between interviews and questionnaires in a mixed methods study. |
| C2 | Powell, T., Cohen, J., & Patterson, P. | 2021 | Keeping Connected With School: Implementing Telepresence Robots to Improve the Wellbeing of Adolescent Cancer Patients. | *Frontiers in psychology* | Adolescent cancer patients, their parents, school and clinicians talk about the effectiveness of using telepresence robots to connect adolescents to school during cancer treatment through an interview. |
| C2 | Rau, L. M., Grothus, S., Sommer, A., Grochowska, K., Claus, B. B., Zernikow, B., & Wager, J. | 2021 | Chronic Pain in Schoolchildren and its Association With Psychological Wellbeing Before and During the COVID-19 Pandemic. | *Journal of Adolescent Health* | In this research the authors analyse changes in the experience of chronic pain during the COVID-19 pandemic in school children with chronic pain through an assessment. |
| C2 | Romero, K., & Alonso, L. | 2007 | Un modelo de práctica pedagógica para las aulas hospitalarias: el caso del Hospital Universitario de Los Andes.  *A model of pedagogical practice for hospital classrooms: the case of the Hospital Universitario de Los Andes.* | *Revista de pedagogía* | Assessment of the suitability of a pedagogical practice model for children who assist at the hospital classroom at the Hospital Universitario de Los Andes. |
| C1 | Schreiner, K., Grossoehme, D. H., Friebert, S., Baker, J. N., Needle, J., & Lyon, M. E | 2020 | “Living life as if I never had cancer”: A study of the meaning of living well in adolescents and young adults who have experienced cancer. | *Pediatric blood & cancer* | The components of living well are analysed by interviewing adolescents and young adults who have experienced cancer. |
| C3 | Stewart, R., Pardi, V., Buck, J., Smallwood, O., & Wright, W. | 2021 | Community‐Academic Partnership to Improve the Oral Health of Underserved Schoolchildren in Rural North Carolina. | *Journal of School Health* | An intervention is provided through an educational programme to underserved schoolchildren and the appropriateness of a community-academic partnership to improve oral health is evaluated. |
| C4 | Taylor, R. M., Franck, L. S., Gibson, F., Donaldson, N., & Dhawan, A. | 2009 | Study of the factors affecting health‐related quality of life in adolescents after liver transplantation. | *American Journal of Transplantation* | The purpose of this study is to identify factors affecting health-related quality of life in adolescents after a liver transplantation through the use of a questionnaire. |
| C4 | Vente, T. | 2021 | How Do you Focus on Quality of Life When Kids Cannot Go to School or Outside? | *Current Pediatrics Reports* | This research focuses on the definition and application of quality of life in paediatric research. |
| C2 | Verger, S., Negre, F., Rosselló, M. R., & Paz-Lourido, B. | 2020 | Inclusion and equity in educational services for children with rare diseases: Challenges and opportunities. | *Children and Youth Services Review* | This research considers the elements that play a role in the inclusive education for children with rare diseases by the use of interviews and focus groups. |
| C2 | Verger, S., Rosselló, M. R. & De la Iglesia, B. | 2016 | Physical education and care of students with chronic illness at school. | *Revista de Psicologia del Deporte* | Schooled children and teenagers with a chronic illness answer through interviews and focus groups what are the essential elements to enabling the solid emotional and physical development of students with a chronic illness. |
| C4 | Walker, H., Brisman, R., Miller, M. C., Cowfer, B., Akard, T., & Gilmer, M. J. | 2021 | The effects of animal-assisted interactions on quality of life in children with life-threatening conditions and their parents. | *International Journal of Palliative Nursing* | The evidence for the feasibility and efficacy of a randomised clinical trial using animal-assisted interactions to help improve the quality of life of the children with an advanced life-threatening condition and their primary caregivers. |
| C1 | Wiener, L., Weaver, M. S., Bell, C. J., & Sansom-Daly, U. M. | 2015 | Threading the cloak: palliative care education for care providers of adolescents and young adults with cancer. | *Clinical oncology in adolescents and young adults* | A conceptual framework is provided for adolescents and young adults palliative care education through an intervention directed to adolescents and young adults with cancer. |
| C2 | Wood, I. | 2009 | An educational program in a pediatric hospice setting. | *American Journal of Hospice and Palliative Medicine* | This article describes the Canuck Place educational program, gives insights into the importance and challenges of providing a complete school experience, and discusses the expanded role of the teacher in the pediatric hospice setting. It uses a descriptive qualitative methodology, with no intervention neither participants. |
| C4 | Zaidman-Zait, A., Curle, D., Jamieson, J. R., Chia, R., & Kozak, F. K. | 2017 | Health-related quality of life among young children with cochlear implants and developmental disabilities. | *Ear and hearing* | Families of young children with cochlear implants respond to a questionnaire aimed at determining the elements involved in health-related quality of life. |
